# Supplementary material for: Structural insights into tetraspanin CD9 function
Source: PubMed Central journal article supplement (PMC7105497; doi:10.1038/s41467-020-15459-7), 2020-03-30
Supplement: 41467_2020_15459_MOESM2_ESM.pdf [file 41467_2020_15459_MOESM2_ESM.pdf]

**Title: Supplementary Movie 1**

**Description: Ribbon representation of the CD9 MD simulation.**

A movie of the MD simulation corresponding to 1  $\mu$ s timescale is shown with ribbons.

**Title: Supplementary Movie 2**

**Description: Ribbon representation of the CD9 MD simulation.**

A movie of the MD simulation corresponding to 1  $\mu$ s timescale is shown with surface representation.

The molecular surface is drawn with the Quicksurf feature in VMD<sup>43</sup>
